# Supplementary material
Source: HighWire-hosted journal article supplement (https://jmg.bmj.com/highwire/filestream/185887/field_highwire_adjunct_files/1/jmg-2022-108602supp002_data_supplement.pdf)
Supplement: jmg-2022-108602supp002_data_supplement.pdf [file jmg-2022-108602supp002_data_supplement.pdf]

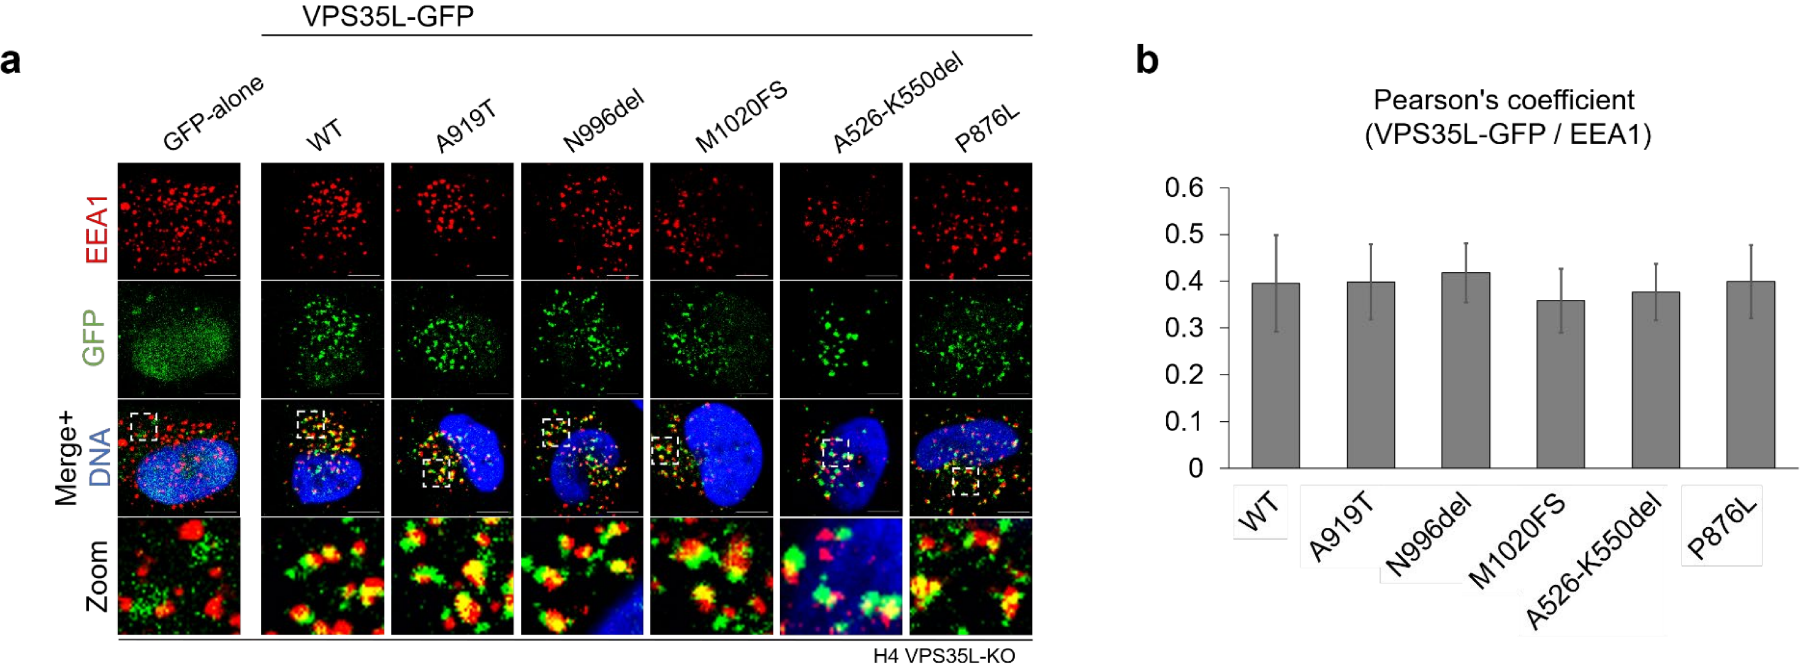

**Figure S2. Colocalization analysis of VPS35L-wildtype and mutant proteins.**

(a) Immunofluorescence staining of endogenous early endosomal marker EEA1 (red) in H4 glioma cell lines transfected with GFP or VPS35L-GFP expressing lentivirus. Scale Bars, 10µm. (b) Quantification of colocalization of EEA1 and VPS35L-GFP from three independent experiments (n = 30 cells analyzed). Bar graph, means and s.e.m are shown.
